# Supplementary material for: RUNX1 haploinsufficiency results in granulocyte colony-stimulating factor hypersensitivity
Source: PubMed Central journal article supplement (PMC4742622; doi:10.1038/bcj.2015.105), 2016-01-08

# Supplemental Figure 1

**A**

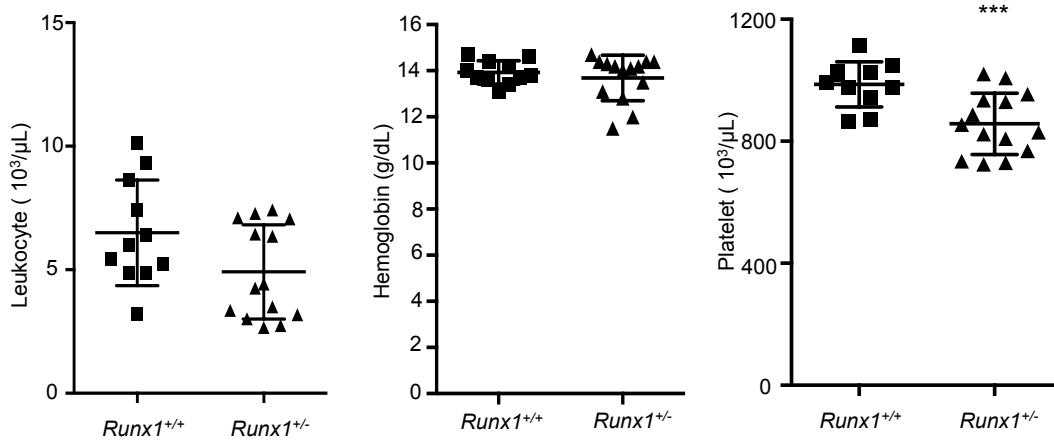

**B**

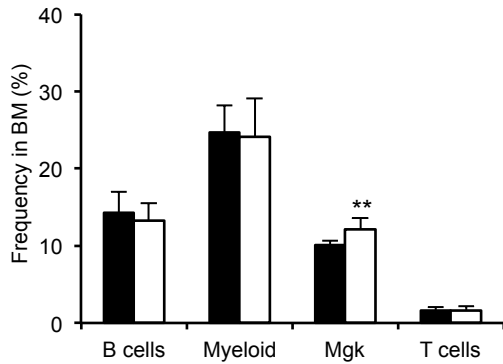

**C**

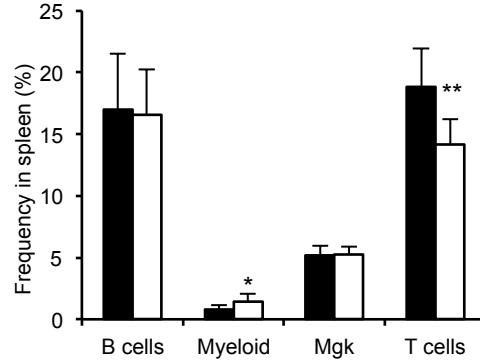

**D**

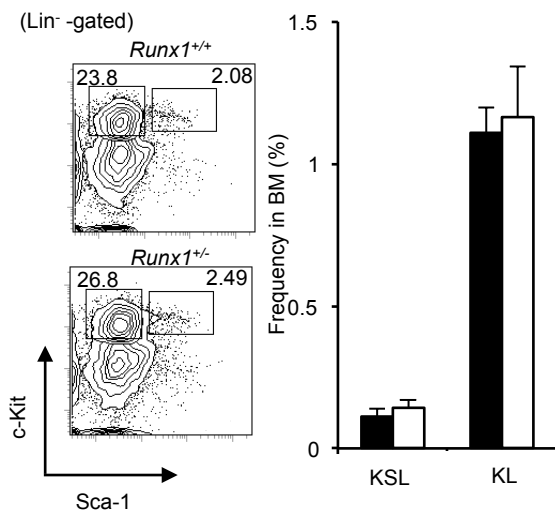

**E**

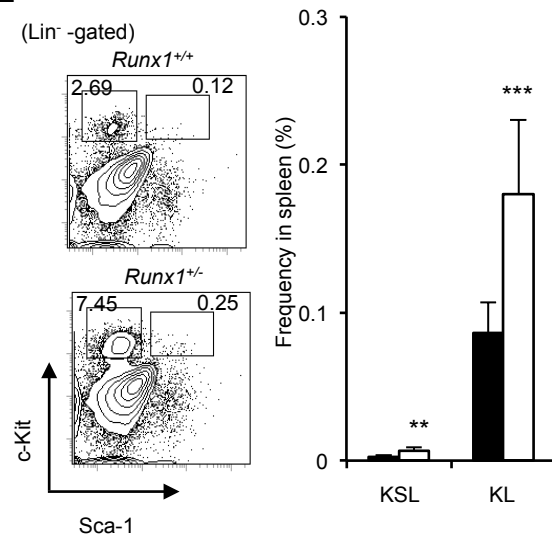

# Supplemental Figure 2

## A

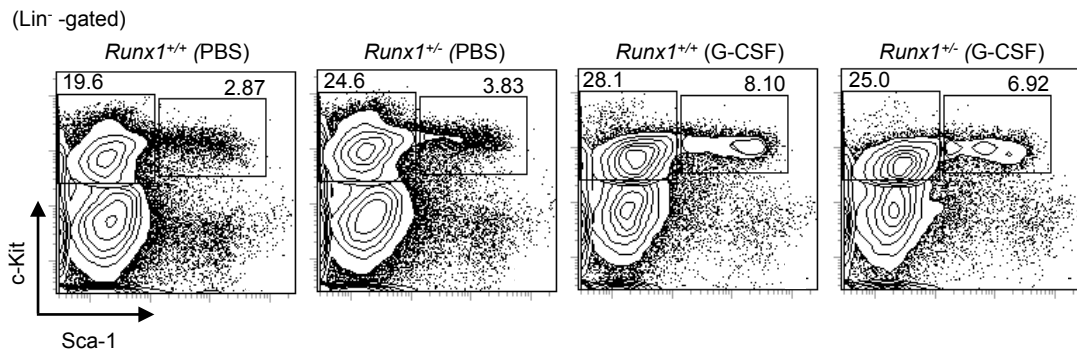

## B

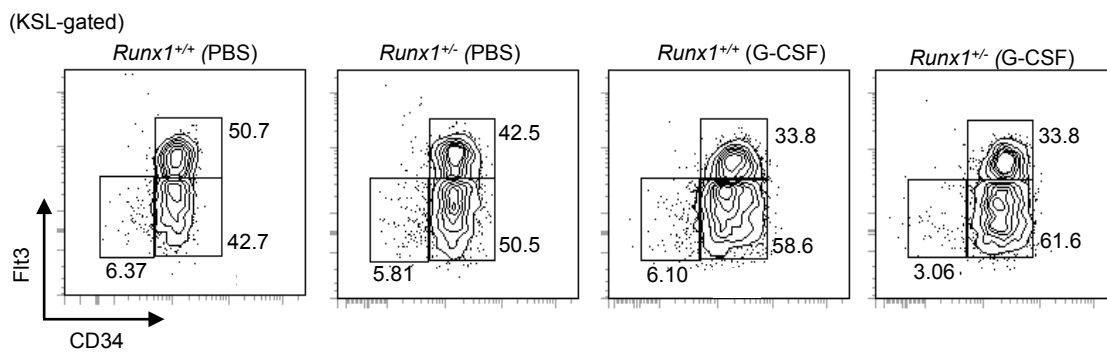

## C

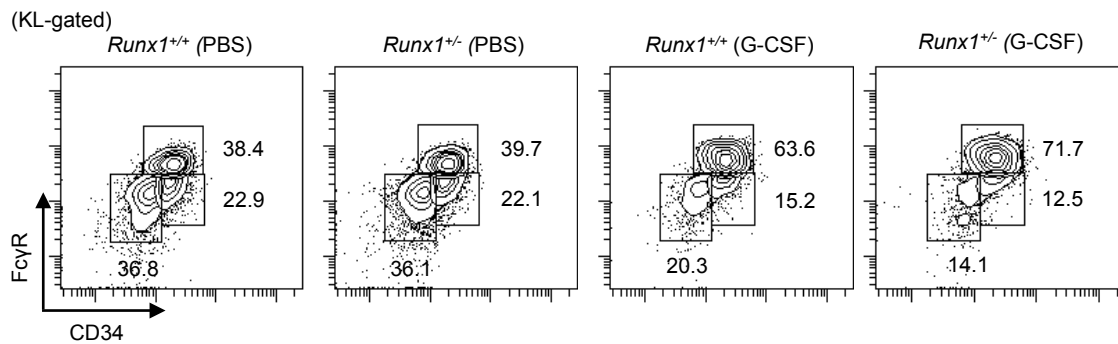

## D

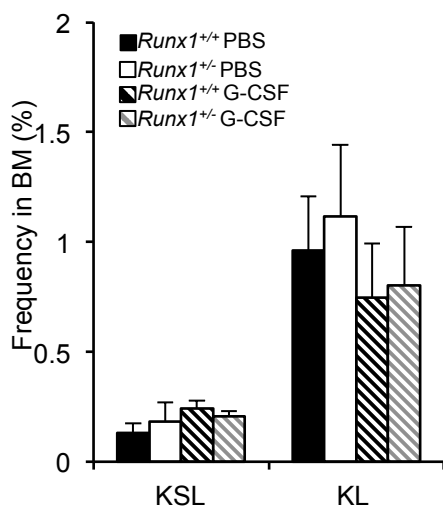

## E

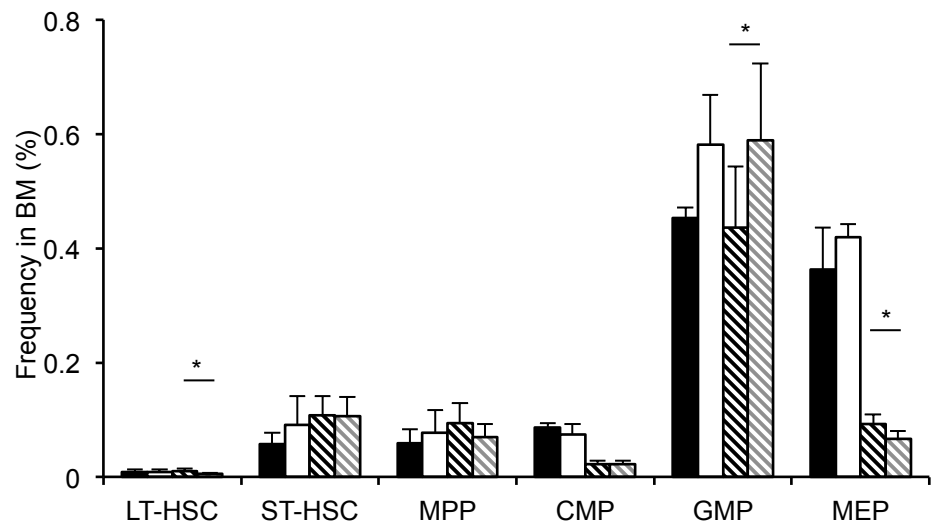

# Supplemental Figure 3

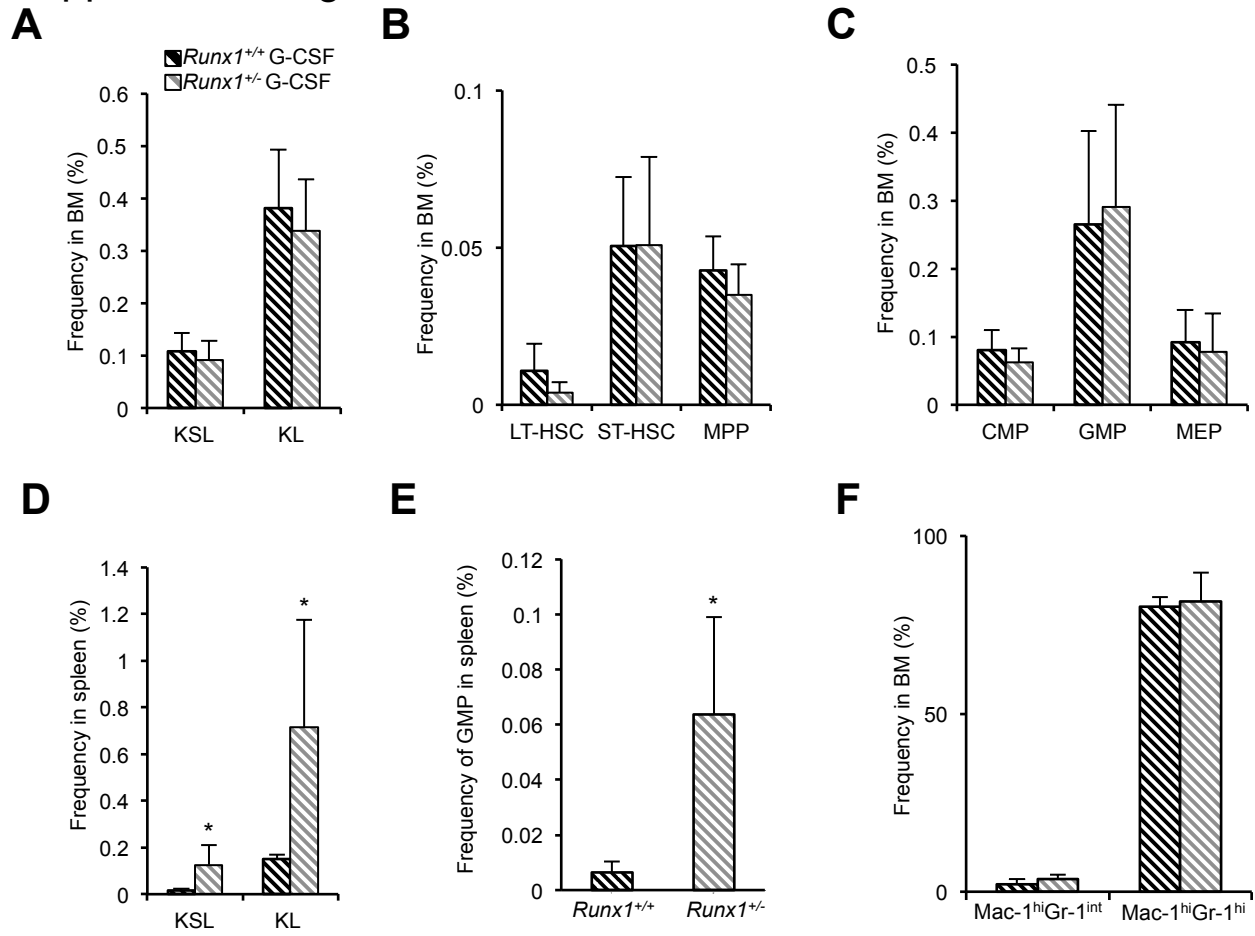

Supplement: bcj2015105x2.pdf [file bcj2015105x2.pdf]
